# Supplementary material
Source: publisher figshare collection journal article supplement (https://geolsoc.figshare.com/ndownloader/files/28250030)
Supplement: Supplementary file 1 [file 28250030]

Table 8. Apatite trace elements
Sample 411A		Bridges of Ross			GPS coordinates: 52.5914679 ; -9.8750846
Apatite	88Sr	±	89Y	±	139La	±	140Ce	±	141Pr	±	146Nd	±	147Sm	±	153Eu	±	157Gd	±	159Tb	±	163Dy	±	165Ho	±	166Er	±	169Tm	±	172Yb	±	175Lu	±	232Th	±	238U	±
X411A_1	903	21	227.4	7.8	132.2	6	438	19	67.6	2.5	343	13	69.8	2.3	20.05	0.59	60.3	2.5	6.83	0.29	37.7	3.1	6.85	0.25	19.38	0.7	2.79	0.15	18.97	0.88	3.34	0.13	17.1	1.6	20.87	0.82
X411A_2	568	9.7	1038	26	1516	33	3856	90	513	19	2381	77	472	13	59.1	2.8	384	13	44.5	1.7	232	8.4	38.4	1.3	89.3	2.5	10.19	0.32	52.9	1.5	6.63	0.2	111.8	8.5	16.42	0.4
X411A_3	120.3	2.4	3314	62	221.3	5.6	975	22	161.3	3.5	894	16	391.5	8.8	15.68	0.42	521.9	9.8	101.1	1.9	669	16	119.8	2.8	308.8	7.6	41.07	0.97	235.8	5	27.52	0.56	11.5	0.62	199.1	4.8
X411A_4	672	24	158.5	5.8	878	27	1980	56	204.9	7.2	795	25	108.1	4	17.58	0.57	71.7	2.5	6.88	0.29	34	1	5.84	0.25	13.99	0.56	1.629	0.087	8.9	0.4	1.347	0.073	58.5	1.9	65.3	1.9
X411A_5	174	3.8	1187	28	99.2	2	357.4	8.5	61.4	1.4	357.7	8.5	156.3	3.6	16.93	0.43	222.1	4.2	41.75	0.7	268.8	5.3	46.4	1	115.8	2.2	15.1	0.33	88.9	1.8	11.38	0.24	0.685	0.055	14.93	0.34
X411A_6	244.3	4.7	713	16	6.5	0.29	31.23	0.76	9.5	0.25	111.2	3.6	80.5	2.2	6.26	0.17	137.2	3.4	20.3	0.5	128.7	3.6	25.42	0.78	68.5	2.2	8.7	0.28	47.3	1.2	6.92	0.14	1.84	0.14	14.12	0.32
X411A_7	496	13	956	27	2415	67	4990	130	586	17	2518	71	480	13	57.7	1.9	395.3	9.5	41.93	0.95	214.4	5.9	37.9	1.1	91.4	3.2	10.89	0.36	58.6	2	8.2	0.29	161.3	3.8	31.2	0.75
X411A_8	178	4.2	2866	67	1461	34	4053	98	555	14	2649	69	653	18	9.87	0.39	614	16	89	2	542	14	97.7	2.6	249.9	6.3	30.29	0.64	160.6	3.9	18.8	0.5	26.9	1.1	9.82	0.29
X411A_9	261.4	4.8	1097	17	1238	26	3484	63	445.6	7.8	2032	41	421.5	7.4	24.91	0.85	331.3	6.2	40.52	0.81	220.1	3.3	38.41	0.75	96.5	1.5	12.15	0.29	67.5	1.5	8.24	0.18	79.8	3.7	10.1	0.3
X411A_10	328.4	7.4	783	17	787	19	1952	48	229.5	6	1076	23	225.4	5.9	23.02	0.65	207.9	3.9	27.18	0.57	158.3	3	29.6	0.61	75.1	1.7	9.11	0.26	49.3	1.4	6.6	0.15	17.51	0.67	3.84	0.074
X411A_11	14.23	0.7	6350	150	610	20	2358	68	369	11	1964	56	789	25	1.29	0.08	967	22	180.7	4.6	1199	41	226.2	7.3	596	17	80	2.1	537	15	71.7	1.8	14	0.53	44.7	2.2
X411A_12	162.6	3.5	1414	31	89.8	2.2	397.2	9.7	81.6	1.8	541	13	262.7	6.1	55.8	1.4	329.6	6.9	54.6	1.3	329.1	7.1	55	1.1	128.1	2.9	15.25	0.31	79.5	2	9.07	0.22	85	44	3.89	0.11
X411A_13	139.4	6.8	1322	41	787	44	2290	130	313	14	1589	58	390	16	27.11	0.95	340	14	47.2	1.9	267.6	9.3	46.5	1.8	114.8	4.2	14.44	0.56	84.5	3.7	9.89	0.39	28.4	1.6	15.79	0.74
X411A_14	435	12	1175	47	1440	41	3714	98	478	17	2148	86	444	15	27	1.4	366	12	44.8	1.6	252.4	9.4	45	1.7	106.4	4.1	12.46	0.57	64.1	2.1	8	0.36	39.5	2.5	9.43	0.41
X411A_15	85.2	9.1	3361	94	291	21	1207	82	195	12	1068	68	496	21	14.05	0.73	593	17	113.1	3.2	726	20	124.8	3.5	321.7	7.9	45.8	1.5	289.2	9.3	35.2	1.1	20.3	2.3	69.9	2.3
X411A_16	199	11	3280	110	563	26	2017	91	296	10	1511	47	544	18	38.7	1.5	658	15	110	3.3	675	21	115.9	4.4	285	11	34.3	1	186.2	5.3	23.92	0.73	46.5	5.2	36.7	1.9
X411A_17	233.7	6.2	3460	110	1252	37	3885	98	538	16	2441	75	696	21	36.9	1.2	610	21	92	2.3	558	18	96.7	2.7	244.9	6.3	32.9	1	188.2	3.5	24.72	0.72	53.6	2.1	11.28	0.32
X411A_18	352	11	1022	40	1190	44	3000	130	362	11	1687	59	351	12	19.75	0.77	295	9.7	38.1	1.1	208.4	6.3	38	1.4	92.3	2.7	10.59	0.39	55.8	2.2	6.83	0.22	13.61	0.73	4.9	0.19
X411A_19	417.1	7.4	1557	37	573	13	1918	40	279.1	5.4	1481	28	366	9.6	40.8	1.9	337	10	45.6	1.5	269	6.4	50.38	0.85	134.5	2.4	18.99	0.5	117.5	3	15.8	0.37	61	11	1.26	0.12
X411A_20	773	14	391.8	8.3	307.4	7.7	844	22	119	2.6	625	17	144.1	4	36.29	0.93	137.2	3.4	15.9	0.37	86.1	2.5	14.72	0.39	33.8	1.1	3.7	0.13	19.54	0.73	2.468	0.08	3.14	0.25	0.976	0.037
X411A_21	343.4	6.6	1103	33	1043	31	2538	76	307	11	1469	38	335	11	42.6	1.2	331.2	8.3	42.3	1.2	238.7	7.6	44.8	1.2	106.5	2.9	12.09	0.4	64.8	2	8.36	0.27	94.5	3.2	51.4	1.5
X411A_22	195.6	4.7	270	11	329	18	830	45	88.5	4.7	377	19	66.3	2.2	13.9	0.56	61.8	1.7	7.97	0.29	48.2	1.9	9.67	0.38	26.1	1.2	3.55	0.17	22.4	1.2	3.46	0.2	30.2	1.2	14.02	0.41
X411A_23	304.6	7.8	1025	31	336	12	1346	35	205.1	4.6	1141	37	317	20	43.5	6.9	324	24	41.6	2.8	226	13	37.8	1.4	90.8	3.1	10.99	0.34	59.2	2	7.4	0.2	225	57	44.6	1.3
X411A_24	467	12	602	26	1052	34	2622	87	307	11	1384	43	325	17	51.5	5.9	316	24	35.1	2.6	160.8	8.9	23.7	1.1	51	1.9	5.56	0.24	28.76	0.86	3.89	0.14	323	47	32.4	1.1
X411A_25	464	11	864	29	14.7	1.5	86	10	19.9	2.7	153	23	69	10	21.6	3.1	106	13	16.7	1.5	121.9	7	28.9	1.1	82.5	2.7	9.25	0.29	42.4	1.4	4.65	0.17	61	11	0.142	0.028
X411A_26	332.5	6.8	1186	43	470	16	1300	39	178.5	5.4	924	26	236.8	7.4	42.7	1.2	257.6	8.3	35.8	1.1	214.8	6.9	40.6	1.3	102.6	2.8	12.46	0.43	67.1	1.9	8.53	0.3	6.04	0.35	1.758	0.051
X411A_27	285.1	5.9	1738	50	114.1	3.4	474	13	83.4	2	492	12	205.6	6.6	31.6	1.1	266.2	7.9	52	1.7	359	11	67.4	2.2	177.8	5.9	23.74	0.74	138.3	5.1	17.06	0.5	2.74	0.21	51.3	1.7
X411A_28	149	2.6	1833	29	152.1	3.6	573	13	101.9	2.3	653	16	278.3	7.2	22.7	1	402.7	9	60.9	1.5	380.4	7.9	73.1	1.5	176	3.7	19.02	0.55	89.2	2.2	10.84	0.26	35.9	3.3	5.04	0.18
X411A_29	313	79	2524	75	395	17	1320	44	185.4	8.1	960	48	343	14	9.9	1.4	426	11	74.3	2.6	494	18	91.9	3.4	231.1	8.3	28.2	1.1	155	6.7	19.54	0.71	5.18	0.86	35.3	1.2
X411A_30	1516	26	291.9	8.4	2250	220	4670	390	501	39	1940	130	273	15	38.6	2.1	163.7	7.8	15.51	0.56	71.6	2.2	10.79	0.36	24.16	0.7	2.79	0.13	15.23	0.69	1.925	0.085	34.9	3.7	9.3	1
X411A_31	793	14	1020	24	1049	25	2822	62	369.2	7.4	1833	42	400	10	48.5	1.2	348.8	7.3	40.91	0.77	225.5	4.2	38.31	0.88	91.3	2.2	10.38	0.28	53.9	1.4	6.83	0.16	35.8	1.3	8.79	0.26
X411A_32	393.2	7.3	68.2	1.4	263	7.1	761	18	104.2	2.3	502	14	90.2	2.5	18.79	0.43	58.1	1.7	4.91	0.18	19.65	0.8	2.54	0.13	4.61	0.25	0.388	0.038	1.83	0.18	0.236	0.02	6.43	0.31	4.18	0.13
X411A_33	1248	45	1047	37	1267	45	3053	67	426.7	8.6	2266	59	672	22	172.7	7.3	686	25	79.3	3.4	345	13	44.6	1.7	78	3.5	6.9	0.31	30.8	1.3	3.66	0.13	494	21	11.96	0.49
X411A_34	222.5	5.5	1046	36	11.16	0.72	56.7	2.6	13.6	0.61	116.3	4.4	71.6	1.8	14.38	0.68	137.5	3.5	22.29	0.68	160.5	5	36.7	1.1	110.5	3.5	15.4	0.58	100	3.7	17.29	0.61	21.7	2.5	18.85	0.8
X411A_35	77	3.2	1947	93	746	30	2470	73	367	11	1881	60	505	14	5.73	0.23	494	13	65.5	1.9	376	12	68.7	2.5	166.1	5.2	20.09	0.87	105.6	5.9	13.13	0.78	12.47	0.76	6.67	0.22
X411A_36	442	15	500	31	301	10	959	30	146.5	5.7	766	36	218	23	35	6.5	213	28	25.9	3.5	124	13	19.4	1.4	43.9	2.3	5.1	0.2	27.5	1.3	3.66	0.18	46	13	9.5	1
X411A_37	733	22	456	21	398	24	1075	56	142.8	7.1	732	37	159.8	5.7	38.2	1.5	150.6	6.9	18.12	0.87	99.2	5.1	17.18	0.89	38.6	1.6	4.27	0.23	23	1.3	2.89	0.18	4.76	0.4	1.51	0.1
X411A_38	597	15	595	15	221.3	7	846	21	140.9	3.7	794	19	225.7	5.9	29.97	0.66	189.9	4.2	22.6	0.54	120.6	2.9	20.72	0.42	52.4	1.4	6.73	0.2	38.9	1.1	5.37	0.18	21.9	1	23.84	0.52
X411A_39	2356	41	280.3	5.7	2966	68	6260	110	718	16	2652	56	336.8	6.4	50.1	1.1	166.7	4	15.01	0.39	67.5	1.3	10.4	0.26	23.55	0.53	2.669	0.086	13.33	0.46	1.742	0.068	60.1	2.1	5.78	0.12
X411A_40	394.1	9	2260	76	1663	51	4620	120	618	19	2860	86	600	16	33.1	1.2	496	13	65.1	2.1	378	13	68.1	2.5	177.4	7.1	24.2	1.1	151.1	6.3	20.06	0.85	59.6	2.8	17.41	0.57
X411A_41	800	24	148	5.3	12.2	1.6	41.8	4	7.62	0.68	51	3.8	17.6	1.3	4.22	0.29	25.7	1.6	3.59	0.2	23.28	0.99	5.27	0.27	16.2	0.65	2.163	0.094	12.62	0.55	2.11	0.11	0.87	0.26	0.157	0.028
X411A_42	269	14	479	32	386	32	1067	65	164	13	835	73	233	23	26.9	5.9	232	25	27	2.8	135	11	21.3	1.7	45.8	3.4	5.13	0.52	24.7	2	3.02	0.29	75	21	3.04	0.39
X411A_43	373.8	5.1	2251	75	73	2	341.5	8.3	70.1	2	466	13	154.1	3.4	44	1.1	198.9	4.5	32.69	0.73	267	7.8	78	2.6	278.9	9.7	42.8	1.3	285.3	9.7	46.8	1.7	10.4	1.2	12.03	0.32
X411A_44	839	18	554	12	518	16	1321	34	175.4	4.8	868	24	185.1	5.3	39.03	0.8	167	3.5	20.91	0.51	113.6	2.2	19.47	0.46	45.7	1	5.3	0.16	27.75	0.85	3.342	0.08	4.63	0.2	1.727	0.035
X411A_45	337.5	7	2791	68	214.2	6.1	1050	28	190.9	6.7	1136	32	459	11	56.2	1.8	513	12	82.4	2.2	525	15	101.8	3	280.7	6.9	40.9	1.1	255.7	7.7	34.9	1	83.3	3.7	24.76	0.6
X411A_46	1149	25	678	17	712	15	1913	38	250.7	6.1	1262	32	262.9	6.7	57.9	1.7	235.6	6.6	27.43	0.62	150.2	3.8	26.42	0.75	64	1.5	7.2	0.21	39.6	1.3	5.22	0.16	16.73	0.71	8.45	0.21
X411A_47	486	13	392	42	59.5	8.5	224	39	37	8.2	222	56	79	25	21.4	7	92	28	11.8	3.2	68	13	13.6	1.7	44.6	3.8	7.12	0.5	45.4	2.6	5.68	0.27	72	24	2.77	0.15
X411A_48	342.1	7.1	1187	38	2054	75	5300	190	660	26	2890	110	529	17	26.01	0.91	395	13	46.4	1.5	248.3	8.7	43.5	1.4	111.1	3.3	13.8	0.43	77.8	2.3	10.53	0.26	79.1	4.6	21.23	0.88
X411A_49	503	15	1668	29	807	13	2248	37	303.3	4.6	1542	28	406.5	8.9	55.5	1.1	401.7	6.4	54.01	0.81	318.7	5.3	58.8	1.1	144.6	2.7	17.19	0.32	91.4	2.1	11.39	0.31	17.8	2.7	1.829	0.071
X411A_50	591	30	231.2	8.7	1178	44	2410	130	239	13	843	36	121.3	6.4	20.5	1.3	83.5	4.4	9.35	0.51	49	2.7	8.53	0.5	21.7	1.2	2.79	0.22	16.5	1	2.59	0.19	53.5	3.4	16.33	0.7
X411A_51	492	14	368	27	185	14	740	58	111.3	8	603	44	123	8.6	29	2	108.2	7.2	12.75	0.95	71	4.9	13.63	0.97	36.8	2.3	4.84	0.35	30.2	2.3	5.06	0.37	41.6	3.6	58.9	4
X411A_52	1137	29	310	18	1106	38	2539	86	281	10	1178	40	181.6	9.9	36	2.9	123.7	6.9	13.14	0.85	66.9	4.2	11.72	0.59	28.1	1.4	3.37	0.19	18.26	0.86	2.54	0.11	116.6	8.4	24.8	1.2
X411A_53	351.6	5.1	854	15	1094	20	2987	56	373.4	6.3	1729	31	372.1	6	26.72	0.9	301.4	5.1	34.65	0.65	178.1	3	31.52	0.52	78.4	1.5	9.53	0.23	55.5	1.5	7.55	0.15	107.5	4.5	26.16	0.77
X411A_54	366	36	2443	78	314	16	1249	52	211.4	8.5	1232	50	461	13	39.34	0.88	501	12	76.7	2.2	479	14	84.3	2.6	217.1	6.1	29.8	1	181	5.5	22.74	0.63	10.6	1.1	2.473	0.082
X411A_55	670	14	468	16	382	13	1039	32	143.3	4.2	727	20	192.3	5	45	1.2	199.8	5.5	22.37	0.48	109.9	2.9	17.89	0.5	41.2	1.3	4.54	0.16	24.08	0.84	3	0.1	47.6	2.8	1.388	0.048
X411A_56	547	13	340	11	2396	71	4100	130	335	12	1089	34	132.1	4.8	18.85	0.62	95.5	2.7	11.01	0.36	62.3	1.9	12.01	0.44	32.9	1.1	4.37	0.19	27.9	1.1	4.43	0.16	75.2	3.6	18.02	0.73
X411A_57	446	11	156.4	5.8	815	19	1664	45	160	3.9	589	18	81.2	2.9	10.31	0.42	59	2.8	6.65	0.34	33.5	1.5	6.01	0.23	14.51	0.53	1.76	0.11	10.43	0.64	1.502	0.082	38.2	2	43.2	1.7
X411A_58	155.3	4.4	1928	57	2784	75	5840	180	715	24	3261	97	680	16	53.1	1.5	591	15	74.6	1.8	410	11	74.1	2.1	178.5	6.4	20.13	0.91	103.6	3.5	13.17	0.44	65.4	5.7	9.47	0.32
X411A_59	484	13	505	16	314	10	1248	40	200.3	6	1097	34	238.8	6.9	31.54	0.9	181.1	5	20.16	0.63	106.2	3.3	18.54	0.57	46.4	1.3	6.02	0.2	34.99	0.96	4.97	0.14	16.32	0.67	17.41	0.42
X411A_60	1106	29	534	14	1010	29	2717	73	347.1	9.9	1654	39	318	5.9	38.2	1	237.4	5.8	25.65	0.73	123.2	3.9	20.22	0.55	46.1	1.4	5.39	0.21	28.5	1	3.87	0.18	232.6	6.3	79.1	1.9
X411A_61	180.3	5	683	20	1311	30	3175	76	366	10	1595	37	301	9	23.97	0.76	223.9	5.1	26.73	0.77	144.1	3.7	25.51	0.69	63.2	1.7	7.79	0.26	41.3	1	5.49	0.14	47	1.2	14.8	0.42
X411A_62	703	17	552	33	553	41	1439	96	184	11	908	49	193	10	39.7	1.5	178.2	9.1	21.8	1.1	120.2	6.7	20.7	1.1	47.6	2.7	5.63	0.37	28.4	1.9	3.56	0.23	7.3	1.1	1.92	0.11
X411A_63	194	10	4570	130	527	14	1890	57	280.6	7.3	1488	40	535	16	16.9	1	618	16	112.6	3.6	776	23	159.1	4.3	464	14	66.9	1.8	428	11	56.5	1.6	25.3	1.6	49.7	1.3
Sample 412		Bridges of Ross			GPS coordinates: 52.5914679 ; -9.8750846
Apatite	88Sr	±	89Y	±	139La	±	140Ce	±	141Pr	±	146Nd	±	147Sm	±	153Eu	±	157Gd	±	159Tb	±	163Dy	±	165Ho	±	166Er	±	169Tm	±	172Yb	±	175Lu	±	232Th	±	238U	±
X412_1	540.5	9.3	786	25	1347	21	3474	73	413.9	9.3	1821	41	346	11	51.5	3.1	264	10	30.5	1.2	162.9	5.8	29.7	1.1	74.9	2.3	9.74	0.32	57.9	1.6	8.22	0.26	60.2	7.6	48.7	1.7
X412_2	1008	25	468	14	681	27	1757	62	236.2	8.7	1135	38	256.3	8.7	30.4	1.6	206.5	7.2	22.8	0.74	112.3	3.3	16.82	0.62	36.1	1.4	3.67	0.18	19.5	1.2	2.49	0.17	41.1	2.8	11.78	0.66
X412_3	442	8.4	620	15	514	16	1513	40	210.7	5.3	1030	24	241.1	5.5	28.83	0.74	196.9	4.8	24.07	0.66	129	4	22.57	0.52	55.5	1.4	6.86	0.22	37.2	1.2	4.8	0.12	21.7	1.1	9.17	0.25
X412_4	1341	29	1439	37	41.9	4.9	186	17	39.4	3.6	281	26	162	10	39.2	2.9	270	12	45.6	1.2	283	7.4	50.1	1.2	126.3	3.4	15.75	0.44	88.6	2.3	11.06	0.3	65	10	12.72	0.34
X412_5	1587	53	785	45	571	21	1704	61	248	12	1370	67	404	27	93.3	7.3	394	30	45.3	3	219	13	31.9	1.9	62.9	3.2	6.33	0.23	29.3	1.1	3.56	0.11	264	34	2.625	0.081
X412_6	900	27	106.9	8.5	1154	53	1095	50	71.5	4.5	284	15	67.7	6.8	17.7	1.7	69.3	8.7	8.1	1	35.5	3.7	4.78	0.47	8.84	0.84	0.835	0.099	4	0.41	0.644	0.044	187	15	28.3	2.1
X412_7	276.4	7.1	1459	46	988	25	2681	42	360	6.5	1796	37	438	11	20.49	0.77	432.2	9.2	56	1.4	321.7	9.4	56.5	1.8	135.7	6.3	15.18	0.69	77.1	3.8	9.45	0.51	51.3	2.6	7.07	0.95
X412_8	212	11	3220	180	1339	61	4480	210	697	34	3630	170	941	34	53.5	3.9	825	29	110.8	4.3	633	31	113.8	5.6	304	16	41.8	2.5	267	17	36.3	2.4	245	11	46.4	3.5
X412_9	535	10	2780	470	80.8	4.8	380	26	77.7	5.2	563	38	282	20	81.9	6.5	415	35	67.8	8.2	450	62	90	13	272	47	39.8	6.5	297	54	48.2	9.1	365	60	190	55
X412_10	238	16	1164	35	447	9	1321	39	188.5	7.7	1006	41	295	19	48.6	5	325	22	44	2.5	254	12	44.5	1.5	108.2	2.9	12.64	0.35	68.4	1.8	8.49	0.18	186	18	20.2	1.3
X412_11	367	15	1095	27	67.8	2	280.3	6.4	53.1	1.5	333.7	7.8	155.6	3.2	12.34	0.48	210.6	3.7	38.56	0.94	248.9	5.5	45.6	1.3	115.3	3.3	14.36	0.47	79.1	2.4	9.35	0.29	1.42	0.57	24.79	0.56
X412_12	137	11	2133	66	347	18	1188	48	181.6	7.6	1005	52	345	15	35.3	3.6	414	14	64	2	417	13	81.5	2.4	224.9	5.6	30.8	0.79	190.3	4.4	26.07	0.61	72.1	9.9	29.66	0.91
X412_13	788	19	713	24	866	37	2041	77	253.3	9.3	1209	39	295.7	7.6	50.1	2.1	290.3	7.5	33.67	0.95	169.1	4.9	26.49	0.81	57.4	1.9	6.24	0.25	31.1	1.3	3.64	0.16	75	12	5.67	0.18
X412_14	2416	67	388	10	797	33	2038	67	248.1	7.7	1190	41	239	8.5	58.9	2.5	194.4	6.4	21.93	0.92	105.5	4.4	15.73	0.69	32.5	1.2	3.4	0.15	16.04	0.87	1.88	0.11	25.4	2.7	3.25	0.16
X412_15	406	11	822	23	449.5	7.3	1454	26	208.3	4.7	1090	32	269	12	35.5	2.8	253	12	31.8	1.4	173.7	6.2	30.36	0.99	73.6	2.3	8.97	0.23	48.4	1.4	6.37	0.17	57.5	8.5	2.91	0.11
X412_16	425	40	1371	25	1405	51	3630	120	439	11	1970	41	478	19	58.4	7.2	467	22	56	2.2	289	8.4	49.1	1.2	117.2	2.9	13.7	0.39	75	2.7	9.55	0.3	176	18	121.7	4.4
X412_17	696	40	1339	75	1146	71	2780	150	358	19	1730	91	439	47	89	15	464	76	59.8	8.4	300	35	50.5	3.6	112.6	5.7	12.87	0.76	64.9	2.8	8.07	0.5	215	76	4.64	0.18
X412_18	334	14	1992	66	224.5	5.1	1023	27	191.9	5	1239	33	541	14	88	3.1	630	18	88.6	2.8	486	17	79.5	2.9	180.4	7	20.26	0.79	99.2	3.9	11.63	0.47	391	15	29.65	0.77
X412_19	1360	25	1530	51	1440	39	3850	100	538	12	2837	80	845	29	205.3	6.5	884	28	106	3.4	485	17	65.1	2.3	114.6	3.3	9.8	0.32	41.5	1.2	4.4	0.16	534	23	6.34	0.13
X412_20	273.2	6.3	2655	59	170.4	4.6	660	16	115	3.1	696	14	279.1	5.2	29.33	0.67	383.3	9.5	71.6	1.5	508	10	104	2.5	292.6	6.3	39.8	1	231.7	5.5	28.91	0.64	3.33	0.21	24.01	0.56
X412_21	718	19	1860	120	1511	81	4380	240	688	43	3820	240	953	64	219	15	869	57	95.2	6.5	446	30	65.6	4	120.2	7.3	10.05	0.6	38.8	2	4.29	0.24	219	20	3.61	0.16
X412_22	187.4	3.1	1209	12	76.2	1.6	306.9	5.7	57.1	1.2	344.4	6.2	162.1	3	22.89	0.48	234.6	3.2	44.95	0.65	290.5	4.2	47.65	0.8	102.5	1.2	11.18	0.23	53.5	1.4	5.86	0.1	7.04	0.77	20.4	0.32
X412_23	3021	71	599	14	9.1	1.3	96.1	9.1	44.3	2.4	751	27	2024	48	435	11	1631	41	100.3	3.1	280.3	8.5	27.08	0.93	40.5	1.3	3.45	0.13	14.04	0.52	1.631	0.079	489	24	5.69	0.32
X412_24	748	24	336	25	333	14	885	39	118	6.4	638	44	185	15	45.3	3.3	183	14	20.6	1.8	94.2	7.3	13.96	0.95	27.7	1.8	2.69	0.17	13.97	0.83	1.678	0.071	76	7	4.76	0.22
X412_25	403	8.9	848	27	328.3	8.2	1000	28	145.2	5.2	807	30	231	14	47.6	3.3	258	13	33	1.6	186.7	7.3	32.8	1	76.8	2.1	8.77	0.26	44.5	1.4	5.58	0.12	92	16	2.23	0.058
X412_26	169.6	3.8	206.7	6.7	160.5	7.3	483	25	72.2	4.3	377	21	155.8	8.5	40.2	1.7	154.1	6.6	18.74	0.79	81	3.2	10.37	0.46	18.39	0.8	1.617	0.088	7.25	0.34	0.675	0.033	12	1.4	0.277	0.038
X412_27	172.8	4.2	1200	22	76.6	1.8	316.3	9	60.4	1.5	368	12	157.3	3.4	28.76	0.81	203.8	4.3	36.73	0.76	245.4	4.7	46.1	1	123.1	2.4	16.51	0.34	92.8	1.8	10.98	0.23	1.56	0.97	14.27	0.23
X412_28	450.8	9.4	249	12	33.4	2	156	12	31.9	2.4	228	17	98.9	7	28	2	115.1	7.4	13.07	0.94	60.4	3.6	9.6	0.47	21.1	0.88	2.54	0.13	13.97	0.58	2.145	0.09	73.7	6.5	18.78	0.79
X412_29	251.6	5.7	3814	88	1425	30	4840	110	742	18	3718	76	967	21	24.35	0.61	884	16	128.4	2.9	760	18	139.1	3.1	352	8.2	44.3	1.1	246.9	5	29.77	0.53	37.6	1.7	19.32	0.4
X412_30	594	11	442	20	1166	26	2514	61	273.8	7.1	1172	38	257	12	61.3	3.4	244	15	28.2	1.8	134.3	8.1	18.78	0.97	36.6	1.7	3.7	0.19	18.18	0.77	2.446	0.078	293	17	68.8	1.7
X412_31	322.9	7.1	1717	41	1069	37	2694	88	342	10	1662	58	382	13	45	1.6	381	11	54.1	1.5	330.9	9.3	62.7	1.7	158.6	3	19.76	0.57	107	2.5	13.31	0.36	18.3	1.9	1.571	0.073
X412_32	255.5	6.6	948	32	22.42	0.8	88.8	2.8	17.57	0.79	119.2	4.2	66.6	2.6	22.26	0.55	130.5	3	26.95	0.71	198.6	6.5	38.5	1.3	97.8	3.5	12.98	0.5	75.2	3.1	9.13	0.34	9	2.6	12.75	0.73
X412_33	504	13	1215	39	525	15	1536	39	219	7.6	1191	50	319	17	62.7	3.7	335	17	44.7	2.2	258	11	46.5	1.9	108.5	3.1	12.4	0.31	65.3	1.9	8.11	0.23	29.7	9.7	3.014	0.085
X412_34	542	13	1458	44	1570	46	4160	130	560	18	2615	77	541	12	44.01	0.93	449	10	55.8	1.4	307.3	6.7	54.7	1.3	133.3	3.1	15.28	0.37	80.5	2.1	9.91	0.26	58.1	1.9	15.94	0.39
X412_35	663	30	224.2	9.2	26.9	1.6	102.6	6.8	16.73	0.94	97.3	6.7	38	2.5	10.31	0.65	49.6	3.2	7.1	0.36	43.7	2	8.15	0.38	20.18	0.91	2.39	0.15	13.57	0.9	1.89	0.17	31	2.5	0.344	0.033
X412_36	197	4.6	273	8.2	743	20	1474	41	134.9	3.3	512	16	84.8	3.9	16.54	0.84	68	2.8	8.59	0.43	49.5	1.8	9.65	0.41	27.13	0.8	3.66	0.13	25	1	3.79	0.13	30.7	2.3	17.97	0.67
X412_37	121.2	5.1	462	36	2720	200	3270	280	262	23	937	82	144.2	9	16.5	1.3	118.3	6.7	14.58	0.97	79.7	5.1	15.1	1.1	39.5	3.3	5.23	0.53	31.8	3	5.22	0.49	66.6	3.6	26	2
X412_38	337	15	375	33	78.3	5.8	309	34	62.5	7.9	448	63	203	28	29.7	6.8	224	29	26	3.2	121	15	17.1	1.9	35.6	2.9	3.99	0.21	24.42	0.93	3.27	0.15	96	28	7.1	0.29
X412_39	596	26	1867	56	146.2	8.4	735	39	139.5	6.8	899	39	421	11	82	5.8	591	26	80.5	2.8	446	13	75.9	1.8	174.1	5.4	19.64	0.83	97	4.7	11.24	0.54	550	36	6.79	0.38
X412_40	548.7	9.7	219	11	19.9	2.3	108	13	23.5	2.6	173	20	91	12	26.1	3	118	14	13.6	1.3	63.1	5	9.4	0.58	19.02	0.9	1.977	0.094	10.15	0.54	1.32	0.12	124	23	1.48	0.11
X412_41	2296	46	279	18	27.3	2.8	147	19	31.6	4.8	230	34	104	13	28.4	3.9	126	14	16.5	1.7	79.7	7.5	11.46	0.82	22.2	1.1	2.08	0.12	9.24	0.51	1.154	0.054	75	10	0.306	0.023
X412_42	919	18	738	17	698	18	1805	40	238.9	5.1	1213	32	276.6	7.8	59	1.6	258.6	6.8	31.62	0.76	163.7	3.5	27.78	0.63	62.1	1.3	7.03	0.19	35.3	1.3	4.39	0.13	31.4	5.3	2.878	0.082
X412_43	649	15	434	12	353.4	8.8	962	23	132	3.3	674	17	149.9	5.6	35.3	1.1	140.3	4.1	17.02	0.42	91.3	2.3	16.37	0.49	37.5	1.1	4.25	0.18	21.81	0.61	2.765	0.09	3.74	0.17	1.331	0.037
X412_44	1403	31	2563	76	987	31	3410	120	543	18	3168	98	1115	28	288.2	7.6	1203	32	145.6	3.2	709	18	101.6	2.7	191.5	6.2	17.42	0.52	74.1	1.9	8.13	0.26	507	14	15.49	0.45
X412_45	358	22	828	34	361	10	1107	39	161.1	6.4	891	34	274	13	59.1	3.9	300	16	37.4	1.8	196.9	9.2	32.8	1.3	74.5	3.2	8.25	0.4	45	2.2	5.93	0.36	118	11	10.2	2.6
X412_46	191	10	2640	77	278.3	7.2	1142	26	183.1	4.3	1037	29	401	10	23.9	2.6	461	11	79.4	1.6	508	10	95.2	2.1	253.4	6.1	35.19	0.86	204.6	5	25.31	0.65	39	8.3	16.99	0.45
X412_47	316	4.9	1298	26	115.5	3.4	422	8.7	74	1.1	452.8	7.9	196	5.2	49.4	1.4	258.7	5.3	43.5	1	282.2	6.4	50.9	1.1	130.4	2.8	17.51	0.41	108.8	2.6	13.75	0.31	69.5	3.1	15.8	0.33
X412_48	656	21	775	17	1427	47	3900	110	496	16	2108	63	398	11	25.62	0.76	294.4	6	33.35	0.96	171.2	4.5	28.16	0.9	66.2	2	7.44	0.23	35.9	1.3	4.36	0.13	91.6	3.6	16.92	0.53
X412_49	339	12	1053	27	66.3	3.3	331	12	71.2	2.8	470	19	218.5	8.7	47.3	2.2	268	12	43.3	1.4	262.9	7.1	44.2	1.3	102.5	2.6	12.24	0.37	62.4	2.1	6.79	0.22	42.7	5.8	16.14	0.45
X412_50	1162	21	80.9	3.1	65.7	1.8	249.5	5.8	39.5	1.1	202.4	5.8	42.4	2	11.03	0.49	37.1	1.8	4.28	0.23	20.31	0.97	3.19	0.15	6.91	0.36	0.807	0.041	4.1	0.22	0.579	0.035	14.1	1.4	16.99	0.33
X412_51	110.2	5.5	3780	110	461	11	1943	42	317.4	8.2	1829	52	599	18	16.85	0.99	630	15	100.2	2.8	642	18	125.7	3.5	350	10	48.9	1.4	301.6	8.4	39	1	47.4	2.6	33.5	1.5
X412_52	197	12	2109	46	220.3	6.2	928	24	167.5	3.7	1038	22	382.4	7.5	31.8	1.9	440.4	8.5	61.6	1	364.4	7.2	67.7	1.6	182.4	4.4	25.05	0.7	155.3	4.2	21.05	0.56	100	11	4.78	0.11
X412_53	781	27	526	11	423.4	9.4	1156	26	161	3.6	827	26	204	13	51.7	3.7	196	15	22.5	1.4	117.2	4.4	19.17	0.57	44.3	1.1	4.8	0.15	25.79	0.88	3.23	0.13	20.1	5.6	1.614	0.054
X412_54	540.1	7.9	795	13	219.4	2.9	964	17	176.5	3.9	1093	26	373.8	9.5	76.6	1.9	363	9.2	43.4	1	204.2	4.3	29.85	0.67	63.9	1.5	6.72	0.24	37.08	0.95	4.77	0.16	184	12	12.11	0.35
X412_55	226.2	5.6	2055	76	1840	90	5210	300	708	35	3370	170	734	39	37.3	6.7	646	35	82.6	4.6	456	23	79.3	3.7	188.1	7.3	22.79	0.76	126.1	4.7	16.18	0.66	127	32	29	1.9
X412_56	526	14	484	11	1508	37	3001	83	281.3	6.5	1032	29	151.7	4.6	22.38	0.93	118.4	3.8	14.06	0.51	81.2	2.6	16.08	0.47	43.9	1.1	5.88	0.17	34.9	1.1	5.3	0.14	22.2	2.1	4.51	0.11
X412_57	2420	70	369.3	7.5	5.62	0.47	49.5	2.2	18.13	0.63	226.9	6.1	443	10	135.7	3	696.6	9.8	56.92	0.77	176.9	2.6	18.25	0.36	29.51	0.73	2.74	0.12	11.75	0.45	1.027	0.061	9.67	0.57	0.087	0.01
X412_58	721	13	751	13	1377	39	3245	93	395	13	1789	47	403	10	55.2	1.7	358	7.3	38.61	0.85	183.8	4.3	28.5	0.72	63.1	1.3	7.46	0.25	39	1.2	4.83	0.14	213.8	8.2	20.53	0.64
X412_59	375.8	6.5	1169	27	294	14	1126	38	192.5	5.9	1222	40	380	14	94.8	3.1	382	14	46.8	1.3	252	6.8	43.9	1.1	104.2	2.1	12.15	0.32	68.1	1.8	9.88	0.29	23.7	2.5	9.03	0.41
X412_60	711	17	545	18	415	14	1148	34	155.2	5	845	30	217	12	55.4	3.1	221	17	25.7	1.8	125.3	7.2	19.67	0.83	43.9	1.5	4.76	0.18	24.2	1	3.08	0.13	98	20	1.59	0.13
X412_61	326	7.1	992	52	974	39	2860	120	383	19	1758	78	409	19	57.6	2.9	356	20	43.5	2.3	219	11	36.4	1.9	85.1	4.5	10.68	0.53	63.4	2.8	9.19	0.4	191	12	79.6	2.8
X412_62	397	16	1356	22	1366	46	3760	210	484	21	2221	69	482	21	16.9	1.1	424	21	53.5	2.4	297	13	51.7	2.2	121.7	4.3	13.51	0.72	68.7	3.1	8.11	0.38	28.6	8.5	7.69	0.25
X412_63	361.3	4.8	951	17	3001	46	5504	70	556.6	8.5	2217	35	384.3	7.2	18.18	0.43	290.6	4.8	34.15	0.59	183.9	3.1	33.75	0.58	84.7	1.5	10.76	0.3	59.4	1.7	8.07	0.18	209.5	4.8	59.84	0.82
X412_64	864	19	786	42	309	16	1413	81	238	14	1407	82	410	24	99.5	6.1	392	23	49.7	3.3	237	15	33.9	2.4	61.4	4.2	5.34	0.27	23.4	1.3	2.58	0.12	153	17	15.8	0.46
X412_65	1740	35	346.3	5.7	11.1	2	53.6	4.3	15.52	0.76	179.3	5.9	314.3	7.1	102.3	2.1	589	13	53.5	1.4	168.7	4.6	17.45	0.51	26.55	0.94	2.23	0.11	9.23	0.55	0.852	0.058	37.4	3.3	0.16	0.019
X412_66	581	19	1303	49	2096	73	5670	210	758	28	3410	130	630	26	50.8	2.2	471	17	53.8	2.1	270	12	46.6	1.5	114.4	3.6	13.72	0.43	77.3	2.5	9.73	0.3	104.2	3.8	76.7	2.6
X412_67	897	14	337	36	42.4	4.5	190	22	40.2	4.6	287	32	130	14	38.5	4.1	164	19	19.4	2.5	95	12	13.8	1.7	29.4	3.7	3.25	0.4	16.5	2.2	2.3	0.23	87	16	0.65	0.12
X412_68	631	15	487	16	393	12	1080	32	150.1	4.8	756	19	170.7	4.9	39.5	1.3	156.7	4.2	19.31	0.61	104.1	3.2	18.11	0.57	42.3	1.3	4.71	0.18	25.03	0.95	3.07	0.1	3.91	0.21	1.389	0.044
X412_69	374.8	9	1260	48	2092	84	5540	160	667	31	2960	120	529	15	16.9	0.73	396	11	47.1	1.4	257.6	7.9	45.3	1.2	113.5	3.9	13.93	0.44	74.4	3.1	9.1	0.3	35.2	1.4	28.7	1
X412_70	1227	31	918	29	1490	90	3340	150	414	20	1877	61	417	12	89.3	2.4	375	10	45.8	1.3	231.7	6.3	36.8	1	79	2.6	8.45	0.4	41	2.1	4.77	0.22	107.1	8.4	4.28	0.27
X412_71	374	12	2628	79	258.7	7.1	1254	37	217.7	7.4	1322	40	522	12	72.1	1.6	614	15	90.4	2.7	538	16	99.4	3.3	263.7	8.1	35	1.1	212.9	7.4	28.2	0.96	170.4	8.4	55.3	2
X412_72	1134	23	794	22	700	18	1922	44	254.5	5.6	1269	33	278.5	7.5	54.8	1.6	252.7	6.2	31.35	0.9	174.7	5.1	30.13	0.79	72.2	1.9	8.33	0.25	43.85	0.98	5.47	0.18	8.7	2.1	3.006	0.084
X412_73	486.3	9.7	513	33	842.9	9.1	1743	33	195.9	6	934	41	257	19	62.1	5.4	266	23	31.6	2.6	147	12	20.7	1.4	41	2.4	4.34	0.21	22.4	1	3.062	0.091	214	27	39.33	0.62
X412_74	862	23	332	12	326.8	8.5	1135	32	162	5	846	23	186.8	5.2	28.51	0.8	144.6	3.8	16.28	0.54	78.2	2.5	12.59	0.53	28.3	1	3.07	0.17	16.13	0.72	2.11	0.13	23.77	0.8	6.51	0.5
X412_75	444	19	1450	50	384	15	1522	71	220.1	7.4	1270	43	406	14	57.5	3.1	381	14	49.3	1.5	282.8	9.1	51.1	1.6	130.6	3.9	17.19	0.55	102.6	3.6	13.7	0.47	44.1	4.4	14.14	0.85
X412_76	2022	46	365	10	2.43	0.26	27.4	1.7	11.42	0.56	148.9	5.5	319.8	9.6	106.4	2.8	641	16	58.5	1.7	186.2	4.5	18.66	0.49	28.36	0.97	2.63	0.11	10.49	0.46	0.972	0.058	5.89	0.63	0.0642	0.0069
X412_77	328.5	9	1264	31	248.5	6.7	702	23	95.5	3	509	23	167.1	7.4	54.2	2.3	207.8	9.7	31.4	1.3	204.5	5.9	42.9	1.1	132.1	3.8	20.35	0.58	138	3.7	19.84	0.46	53.7	5	50.2	1.2
X412_78	653	15	545	13	416	10	1154	29	157	4.3	815	21	184.8	5.8	46.2	1.3	172.7	4.2	20.73	0.66	111.3	2.7	19.26	0.56	44.8	1.2	4.95	0.15	26.25	0.66	3.28	0.11	5.6	1.6	1.291	0.036
X412_79	196.6	5	2400	65	204.1	7.1	776	24	129.2	4.1	720	24	318.2	7.7	11.85	0.61	405	10	73.8	1.8	485	11	89.1	2.2	231.1	5.9	29.38	0.87	162.2	3.6	19.78	0.6	15.1	2.3	49.86	0.99
X412_80	5890	380	1259	82	331	28	1445	83	204	11	1144	72	310	22	119.8	6.9	365	31	50.2	4.5	277	22	46.5	3.3	99.3	6.2	9.77	0.49	42	1.6	4.21	0.15	296	45	9	1.1
X412_81	676	11	793	15	484.1	9.9	1386	30	190.9	3.5	1007	22	256.7	5.8	50.8	1.1	253.1	5.8	31.61	0.66	172.4	4	29.48	0.67	67.3	1.5	7.42	0.23	38.29	0.85	4.65	0.14	14.6	3.1	2.186	0.065
X412_82	179.5	5.6	2025	61	131.6	3.9	505	15	101.4	3.1	683	19	290.7	9.1	4.52	0.22	355.9	7.9	55	1.6	354.8	9.6	69.7	1.7	190.4	5.6	26.64	0.77	166.5	4	22.68	0.51	2.89	0.25	14.63	0.61
X412_83	1027	28	200	13	807	24	1877	63	196.6	6.3	793	30	134.6	7.2	27.9	2.5	104.2	9.7	10.3	1	47	3.6	7.23	0.45	16.9	1.2	2.19	0.16	13.9	1	2.05	0.17	107	15	20.2	1
X412_84	232.1	7.3	473	90	75	12	332	46	67.8	9.7	419	55	163	20	46.9	6	193	21	27.5	3.6	146	26	20.6	3.6	38	6.5	3.39	0.56	14.1	2	1.55	0.19	62.2	8.4	0.97	0.13
X412_85	68	3.8	3660	130	345	11	1371	46	222.1	7.4	1180	40	534	15	7.43	0.35	644	18	116.8	3.1	768	23	135.8	4.6	352	10	49.4	1.6	311	10	38.7	1.4	16.66	0.74	147.9	3.5
X412_86	788	16	417.6	7.5	326.6	6.9	906	22	127.4	2.6	672	15	163.6	4.7	40.45	0.92	155.3	3.8	17.79	0.46	94.5	2.2	15.52	0.42	36	1	3.95	0.16	19.92	0.84	2.641	0.08	3.89	0.26	1.013	0.04
X412_87	837	14	322	10	717	29	1912	61	228.5	6	1036	26	261	10	61.1	2.7	255.7	8.9	26.61	0.92	109.1	4.5	14.09	0.52	26.04	0.83	2.439	0.095	11.97	0.5	1.555	0.081	237	11	13.1	0.57
X412_88	3260	63	241.4	5.4	28.4	7.1	96	19	19.7	2	180.4	7.4	323.4	8.8	99.7	2.7	492	10	40.57	0.95	126.4	3.2	12.26	0.37	19	0.6	1.73	0.11	7.03	0.34	0.616	0.05	9.4	1.8	0.158	0.022
X412_89	159	13	423	20	974	30	2057	68	197.3	7.4	766	28	145	10	25.7	2.8	140	12	15.6	1.2	78.8	5.8	13.44	0.71	34.2	1.5	4.55	0.2	33.1	1	6.48	0.19	68.9	7	46.6	1.4
X412_90	1340	180	707	27	244	17	755	67	123.8	9.8	847	47	820	81	184	13	828	62	69.3	2.4	253.4	4.3	31.5	1.3	55.4	2.9	5.4	0.32	25.7	1.7	3.3	0.23	467	18	12.18	0.74
X412_91	1693	26	351.4	6.7	3.23	0.6	26.1	1.4	9.8	0.57	139.9	5.8	281.8	8.2	97.5	2.3	590	14	54.5	1.2	179.3	4.2	17.6	0.51	26	1.1	2.01	0.16	8.52	0.72	0.675	0.072	12.9	1.3	0.109	0.011
X412_92	199.6	5.1	2636	70	614	19	2046	52	316.9	9.1	1835	68	530	17	76.1	2.4	610	19	84.5	3.3	515	16	97.5	3.4	246.1	8.1	29.42	0.95	154.2	4.8	18.75	0.52	39.3	2.4	4.3	0.13
Sample 413A		Bridges of Ross			GPS coordinates: 52.5914679 ; -9.8750846
Apatite	88Sr	±	89Y	±	139La	±	140Ce	±	141Pr	±	146Nd	±	147Sm	±	153Eu	±	157Gd	±	159Tb	±	163Dy	±	165Ho	±	166Er	±	169Tm	±	172Yb	±	175Lu	±	232Th	±	238U	±
X413A_1	791	16	447	8.8	185.8	4.6	807	14	148.4	3.3	926	18	295.1	8.3	18	1.5	281.7	7.6	29.4	0.93	125.1	3.4	17.23	0.44	34.9	1	3.89	0.14	19.26	0.47	2.265	0.097	71.6	9.2	7.62	0.19
X413A_2	416.6	8.5	1378	40	259.6	5.6	1058	28	196.3	6.5	1241	44	448	22	87.3	5.1	474	20	56.5	2.5	287	11	49.2	1.6	128.6	3.4	18.35	0.36	121.4	2.3	17.59	0.29	373	29	18.52	0.71
X413A_3	451	20	1123	22	279.2	9.6	1160	28	206.8	4.7	1246	32	389	17	51.5	5.7	361	20	44.6	2.1	239.1	7.1	41.56	0.93	103.5	1.6	13.29	0.34	79.7	2.6	10.86	0.29	178	44	10.18	0.37
X413A_4	601	17	66.8	2.6	179.1	6.5	297.5	9.7	27.63	0.89	100.9	4.3	14.8	1.2	5.22	0.27	14.65	0.75	1.85	0.11	10.81	0.54	2.44	0.11	6.77	0.32	0.888	0.056	6.55	0.49	1.2	0.067	5.94	0.29	2.173	0.088
X413A_5	171.2	3.4	1274	29	101.3	2.5	378.9	8.1	67.2	1.3	404.8	8.6	171.6	3.8	25.52	0.56	240.1	5.3	43.77	0.81	293.2	5.9	53.7	1.2	139.4	3.1	18.81	0.41	119.1	2.7	15.21	0.35	0.499	0.072	16.63	0.36
X413A_6	1471	32	183.4	5.3	1737	46	3500	110	364	10	1462	46	215.6	6.1	34.75	0.86	137.4	3.7	12.54	0.54	52.6	2.2	7.67	0.23	16.31	0.55	1.733	0.076	9.44	0.43	1.274	0.051	137.5	8.4	18.6	0.37
X413A_7	697	16	531	14	373	10	1057	25	154.1	3.6	865	20	261	10	67.6	2.8	277	11	31.2	1.1	142.9	4.8	21.69	0.52	45.3	1.2	4.77	0.17	24.4	0.75	2.9	0.1	203	20	1.561	0.045
X413A_8	1902	44	744	17	877	24	2213	63	272.1	7.6	1295	40	288.9	9.1	67.1	2	275.7	8.1	33.34	0.92	176.3	5.9	29.57	0.93	67.4	2	7.35	0.22	37.5	1.4	4.51	0.1	53	6.5	5.19	0.15
X413A_9	1490	32	425.8	9.1	646	14	1662	32	215.2	4.3	1048	24	222.4	8	53.9	2.1	193.8	7.6	21.95	0.86	110.8	3.8	17.89	0.52	38.8	0.98	4.2	0.13	21.1	0.6	2.563	0.084	49	14	2.686	0.062
X413A_10	4790	120	275	11	976	22	2516	68	340.9	9.7	1658	48	337	16	78	4.5	248	15	24.6	1.6	98	6.3	12.56	0.6	22.5	1	2.17	0.14	10.05	0.57	1.166	0.08	251	29	2.12	0.11
X413A_11	332	13	738	19	1760	47	3840	110	474	14	1977	62	382	12	22.68	0.96	288	9.4	31.21	0.78	155.9	5	26.24	0.73	62.7	1.7	7.2	0.19	39.8	1.4	5.31	0.15	82.5	4.7	21.43	0.8
X413A_12	323.9	6.5	973	44	1687	96	4000	210	485	32	1980	120	343	17	23.4	1.3	272	12	34.4	1.7	192.4	9.3	34.7	1.9	91.4	4.7	11.55	0.68	66.8	3.8	8.91	0.57	66.9	8.4	17.6	1.6
X413A_13	737	18	553	23	433	19	1185	47	167.4	6.6	890	36	212.7	8.3	51.4	2	201.9	6.6	24.06	0.85	124.4	4.9	20.8	0.77	48	1.7	5.25	0.24	27.5	1.3	3.47	0.17	58	3.8	1.601	0.069
X413A_14	770	22	230	8.4	12.39	0.9	53.1	5.4	11.5	1.1	83.1	9	37.2	3.5	9.41	0.79	42.5	3.6	5.67	0.44	34.2	2.2	7.75	0.4	29.8	1.3	5.99	0.26	45.5	1.6	6.75	0.24	50.3	3.3	0.291	0.022
X413A_15	625	16	1169	32	942	29	2732	72	372.9	8.9	1882	43	479	14	60.1	2.9	430	14	52.4	1.3	274.3	7.6	45.2	1.1	111.5	3.3	13.59	0.41	78.8	2.4	10.52	0.3	309	23	59.7	1.6
X413A_16	155.6	2.8	2674	86	952	38	3350	130	529	19	2600	100	676	24	28.3	2.8	609	22	80.7	2.7	470	14	92.7	2.6	261.2	7.9	37.5	1.5	245.2	8.3	37.1	1.3	170	28	70	2
X413A_17	671	19	420	14	732	25	2135	67	297.7	8.5	1480	43	287.4	8.4	28.53	0.99	216	6.1	21.62	0.68	105.2	3.8	16.99	0.58	38	1.6	3.9	0.19	19.05	0.73	2.5	0.11	50.8	2.4	9.9	0.29
X413A_18	213	4.5	1549	37	70.9	1.9	330.9	7.1	65.3	1.5	399	11	191.5	4.4	19.81	0.72	244.6	5.7	48.13	0.96	331.6	6.5	63.5	1.3	177.5	3.9	26.05	0.61	163.5	3.8	20.78	0.6	12.5	1.1	62.9	1.4
X413A_19	152.6	5.1	1164	48	1544	62	4060	180	521	22	2380	110	484	20	27.3	1.2	385	13	45.8	1.7	250.6	9	43.8	1.8	106.8	4	12.33	0.47	62.5	2.3	7.51	0.24	64	3.7	13.21	0.63
X413A_20	83.5	2.3	5080	110	360	11	1566	44	275	8.9	1517	34	673	15	12.8	1.1	836	17	147.1	3.1	979	22	190.3	4.9	525	11	72.9	1.9	469	14	63.7	1.7	55.9	4.3	82.8	4.1
X413A_21	2680	100	329	14	4.67	0.44	35.2	1.1	13.9	0.55	180.4	4.2	391	11	120.7	3.2	634	17	52.1	1.6	166.1	5.4	17.29	0.71	28.5	1.6	2.78	0.18	11.29	0.77	1.069	0.087	8.82	0.9	0.394	0.053
X413A_22	245.9	6.8	2382	94	175.9	6.6	825	22	146.9	4.7	868	29	382	14	22.32	0.74	501	16	87.8	3.4	545	22	94.5	3.8	229	12	28	1.6	165	11	19.3	1.3	2.05	0.23	29.5	1.7
X413A_23	837	25	856	26	1151	37	2990	110	388	14	1812	51	384	12	36	1.1	307.8	8.5	36.3	1.1	193.4	6	34.02	0.94	79.2	2.2	8.95	0.31	48.6	1.7	6.02	0.18	22.08	0.93	7.66	0.23
X413A_24	1028	24	224	24	40.1	4	198	20	42.8	4.3	311	35	118	18	30	4.6	121	20	13.1	2.1	59.5	8.4	9	1	19.7	1.8	2.05	0.13	10.68	0.69	1.451	0.075	74	19	1.055	0.054
X413A_25	270.5	9.1	1127	45	98	3.9	350	12	69.8	2.7	489	17	216.2	7.8	12.03	0.56	263.1	9.9	36.7	1.6	213.5	9.6	39.6	2	105.1	4.8	13.69	0.7	84.9	3.5	11.51	0.45	11.2	1.2	12.58	0.66
X413A_26	1499	25	483	13	584	14	1526	39	207.2	4.8	1081	20	255.4	8.7	61.7	2	233.1	9.8	26.5	1.2	126.8	4.7	19.48	0.52	41.1	1.1	4.33	0.14	21.24	0.73	2.471	0.091	72	12	1.924	0.057
X413A_27	656	15	445	13	1271	32	2867	68	322.1	9.4	1340	35	227	5.9	19.96	0.5	158.9	3.8	18.11	0.51	95	2.4	17.17	0.48	42.6	1.1	5.22	0.13	28.75	0.74	3.97	0.13	39.9	1.3	41	1.3
X413A_28	422	18	902	30	869	37	2080	100	253	14	1222	60	292	15	46.1	1.9	300	17	36.8	2.1	209.8	8.1	37	1.7	93	5.1	11.09	0.63	61.4	3.4	7.87	0.34	63	12	1.415	0.06
X413A_29	379.4	8.2	591	43	106.8	9.9	452	41	86.8	6	574	38	229	11	43.8	2.4	244.9	9.3	28.2	1.1	134.5	6.4	21.8	1.3	52.8	4.1	6.35	0.46	37	3	4.94	0.43	149	25	11.58	0.58
X413A_30	1475	30	322.4	8.2	477	13	1255	33	164.5	4.4	811	23	180.7	5.6	43.7	1.3	151.1	5.2	16.67	0.47	82.7	2.5	12.82	0.42	27.4	0.92	2.76	0.11	14.37	0.58	1.695	0.082	18.6	5.4	2.424	0.053
X413A_31	211	4.9	1202	36	1701	60	4450	130	571	18	2633	73	498	10	16.58	0.6	386.9	8.9	46.8	1.4	252.4	7.7	44.9	1.1	112.2	3.5	13.06	0.4	70	2	8.43	0.24	32.1	1.2	12.69	0.34
X413A_32	719	12	444	18	346	12	977	34	137.5	4.7	701	25	160.5	5.8	40.9	1.3	152.7	5.3	17.6	0.65	95.6	3.9	16.68	0.66	38.3	1.4	4.21	0.18	22.6	0.99	2.79	0.12	3.59	0.23	1.068	0.045
X413A_33	225.6	4.7	358.8	9.1	150.4	4.8	500	17	72.5	2.9	357	15	79.8	3.4	24.79	0.9	80.1	4.1	9.68	0.41	57.4	1.9	12.64	0.3	39.7	1	6.45	0.2	49.4	1.1	9.62	0.25	173.1	6.5	166.7	5.5
X413A_34	57.3	2.5	6100	200	748	25	2679	90	410	15	2117	61	771	22	4.26	0.55	881	21	165.7	4.9	1135	35	222.7	6.8	616	21	88.3	3.1	550	17	70.9	1.9	22.5	2.8	14.01	0.73
X413A_35	522.6	9.9	1142	20	545	13	1615	31	239	4.9	1303	30	386	15	70.7	5.1	411	15	50.3	1.5	255.1	4.7	43.71	0.95	101.4	2.4	11.68	0.35	61.5	2	7.88	0.28	222	27	3.12	0.11
X413A_36	59.4	1.2	3660	170	281	13	1144	53	194.7	8.8	1102	46	515	25	11.62	0.56	633	28	117.5	5.4	761	39	136.9	6.7	355	17	45.3	2.3	250	13	29.6	1.4	18.1	3.3	93.6	8.2
X413A_37	125	15	3030	120	317	10	1334	36	219.5	4.9	1234	30	512	13	19.5	5.7	588	14	96.2	1.8	626	15	113.5	3.2	300	10	40.5	1.5	244.6	9.7	30.6	1.2	116	54	52.1	1.2
X413A_38	341.4	7.6	202.4	5	18.66	0.8	79.8	3.2	15.66	0.61	111.6	5.5	47.2	2.2	6.6	0.31	68.4	2.2	8.52	0.25	47.4	1.4	8.52	0.27	18.63	0.46	1.679	0.081	7.32	0.36	0.994	0.069	7.3	1.8	0.243	0.025
X413A_39	561	13	504	13	134	3.5	447	12	81.1	2.1	518	18	172.3	5.4	27.79	0.9	172.5	5.2	21.28	0.64	113.2	3.3	19.72	0.53	48.1	1.3	5.52	0.23	29.7	1	3.89	0.14	33.9	3	13.67	0.38
X413A_40	154	2.8	2242	47	1570	32	4387	94	607	17	2820	75	646	14	8.46	0.61	574	14	74	1.5	416	10	77.2	1.5	202.9	4.2	25.33	0.6	141.2	3.2	17.92	0.37	39.4	2.7	17.25	0.39
X413A_41	281.6	7.1	1090	30	982	32	2927	74	382	12	1768	52	374	10	24.56	0.65	297	6.4	37.42	0.96	205.5	5.2	37.9	1.2	103.2	3	13.97	0.51	84.7	2.3	11.89	0.29	38.5	1.1	15.72	0.45
X413A_42	811	15	431	13	373	13	988	39	137.5	4.3	689	20	152.2	5	35.22	0.95	143.9	3.8	16.89	0.48	91.5	2.5	16.25	0.46	37	1.2	4.1	0.16	21.39	0.82	2.647	0.095	3.55	0.18	1.193	0.029
X413A_43	144.8	3.2	905	33	24.8	1	133.7	5.8	30.1	1.2	208.3	7.4	91.3	3.9	10.79	0.52	131.6	5	23.26	0.94	162.6	5.8	33.5	1.3	90.4	3.9	11.95	0.49	67.8	2.9	8.63	0.38	0.366	0.063	1.403	0.059
X413A_44	770	18	95.3	2.6	735	27	1590	52	161	3.9	577	18	71.8	2.2	12.6	0.38	44.8	1.3	4.59	0.13	21.97	0.78	3.69	0.13	8.73	0.38	0.99	0.052	5.63	0.27	0.779	0.039	9.97	0.43	8.27	0.18
X413A_45	137.4	2.9	170	11	960	74	1300	110	95.2	8	324	24	52.2	3.7	8.83	0.46	46.8	2.4	5.55	0.4	30.2	1.7	6.01	0.37	16.6	1.2	2.36	0.17	15.8	1.3	2.95	0.26	50.9	2.7	41	2.4
X413A_46	740	21	424	14	338	11	957	30	132.4	4.5	713	27	169.1	8.6	38.8	2.1	158.3	7.4	18.29	0.93	97.3	3.9	16.4	0.51	36.1	1.2	4	0.15	20.72	0.82	2.571	0.086	33.3	9.7	1.276	0.046
X413A_47	365	10	1124	39	282.9	8.2	1050	26	178	4.6	1017	29	308.1	9.3	30.06	0.9	280.9	6.6	36.3	1.1	207.4	7	37.5	1.1	98.6	2.9	13.06	0.41	76.9	2.2	10.24	0.32	27.32	0.94	13.71	0.35
X413A_48	431.2	8.3	1294	42	43.5	1	159.1	4.7	31.5	1.2	223	6.6	112.8	3.3	28.87	0.92	193.3	6.3	32.9	1.2	230.9	6.5	47.7	1.4	134.6	4	18.6	0.52	110.2	3.9	13.98	0.49	5.92	0.52	18.8	1.2
X413A_49	1594	31	72.2	1.8	31.14	0.73	130.9	3	23.43	0.57	137.2	3.2	29.37	0.92	8.08	0.28	25.48	0.72	2.6	0.11	13.02	0.42	2.43	0.1	6.55	0.33	0.889	0.053	5.36	0.29	0.919	0.032	2.25	0.16	7.33	0.15
X413A_50	410.3	8.5	318.9	9.1	964	24	2584	62	283.8	8.1	1087	24	148.7	4.5	26.73	0.76	97.9	1.9	10.21	0.32	52.5	1.5	9.96	0.25	26.96	0.92	3.56	0.12	22.39	0.69	3.71	0.13	99.7	2.6	19.3	0.89
X413A_51	472	18	462	37	499	44	1640	130	218	12	1023	77	236	21	36.6	2.6	201	18	22.8	1.5	112.3	7.2	18	1.1	42.9	1.8	5.05	0.22	31.7	1.4	4.27	0.26	154	22	18.31	0.68
X413A_52	683	16	639	20	601	17	1535	42	200	6.5	1008	31	227	9.5	37.1	2	206.5	7.5	24.87	0.93	133.9	5	23.55	0.78	54.8	2.3	6.18	0.3	32.9	1.7	4.07	0.2	43	7	1.89	0.18
X413A_53	1048	25	639	15	718	23	1776	47	222.8	5.3	1077	31	237.3	6.2	48.4	1.2	207.3	3.9	25.77	0.58	137.1	3.6	22.87	0.67	51.5	1.5	5.91	0.15	30.14	0.96	3.42	0.12	6.97	0.63	2.965	0.098
X413A_54	700	15	401	12	326.8	7.5	917	28	126.5	3.6	660	19	148.1	3.7	34.71	0.89	139.4	3.2	16.74	0.6	88.5	2.3	15.37	0.36	34.8	0.96	3.82	0.12	19.98	0.75	2.483	0.089	11.72	0.73	1.287	0.03
X413A_55	934	41	341	21	681	30	1417	79	153.4	8.7	738	37	296	20	90.6	6.2	387	20	37	2.1	132	7.2	15.97	0.88	27.8	1.6	2.69	0.13	15.4	1	2.46	0.14	332	37	83.1	3.6
X413A_56	310.9	6.7	1462	34	78.7	2.6	393	12	77.7	2.3	504	15	199.1	4.5	27.76	0.69	247.6	6	42.62	0.84	285.2	6.3	55.6	1.3	143.4	3	17.16	0.56	87.9	2.4	10.21	0.32	18.9	0.98	7.68	0.21
X413A_57	286.4	6.2	1545	34	91.5	1.9	388.9	8.9	72.6	1.4	442	11	202.9	3.3	49.6	1.3	277.7	6.1	51.3	1.1	341.7	7.7	62.3	1.5	160.5	3	20.68	0.34	121.8	2.7	14.98	0.32	3.01	0.85	78	1.9
X413A_58	545	13	624	19	142	3.8	604	19	105.4	3.5	612	20	151.3	5.2	37.9	1.4	150.1	5.8	18.49	0.69	109.1	3.6	21.56	0.6	59.7	1.9	7.98	0.28	49	1.7	7.9	0.21	13.5	4.6	21.76	0.54
Sample 414B		Bridges of Ross			GPS coordinates: 52.5914679 ; -9.8750846
Apatite	88Sr	±	89Y	±	139La	±	140Ce	±	141Pr	±	146Nd	±	147Sm	±	153Eu	±	157Gd	±	159Tb	±	163Dy	±	165Ho	±	166Er	±	169Tm	±	172Yb	±	175Lu	±	232Th	±	238U	±
X414B_1	2757	79	425	58	626	19	1612	41	208	10	1058	85	266	39	68	10	256	45	28.9	5.3	132	23	17.8	2.6	31.8	3.7	2.91	0.24	12.7	1.2	1.32	0.12	154	45	4.132	0.095
X414B_2	695	12	404.9	6.8	320.3	6.8	878	21	122.7	2.5	652	16	149.8	3.3	35.36	0.86	145.1	3	16.61	0.41	89.6	2.8	14.93	0.35	34.85	0.78	3.9	0.13	18.84	0.71	2.49	0.11	6.94	0.73	1.104	0.038
X414B_3	233.5	7.2	2751	87	524	23	1835	76	287.2	9.6	1573	48	514	17	44.1	1.8	582	18	84.3	2.5	520	19	100	2.8	264	8.3	35.4	1.1	221.2	7.6	31.2	1.1	5.30E+03	1.10E+03	137	16
X414B_4	235.4	5.6	974	48	44.9	2	187.3	8.7	38.2	1.5	278	12	121	6.1	23.4	1.2	186.2	8.5	28.9	1.3	188.8	8.6	38.2	1.7	100	4.6	12.03	0.58	65.7	3.4	8.79	0.47	15	1.6	1.627	0.062
X414B_5	456	14	262.8	9.1	7.74	0.43	38.7	1.6	8.98	0.35	60.3	2.3	24.1	1	7.71	0.33	32.1	1.2	5.19	0.25	36.9	1.4	8.34	0.3	24.61	0.83	3.19	0.12	19.44	0.77	3.58	0.11	1.92	0.75	3.216	0.092
X414B_6	1711	35	437	11	554	15	1504	47	196.9	5.5	929	24	197.3	5.2	48.3	1.2	173.8	4.1	20.25	0.49	106.4	2.7	17.44	0.44	38.91	0.98	4.2	0.15	21.2	0.69	2.57	0.074	7.48	0.4	2.275	0.059
X414B_7	1590	23	151.6	4.1	22.4	0.89	79.8	2.8	15.49	0.74	104.5	4.8	39	2.4	13.14	0.72	45.9	2.8	5.25	0.28	28.1	1.3	5.28	0.19	14.03	0.49	1.982	0.091	13.79	0.56	2.51	0.1	15.6	2.1	3.72	0.11
X414B_8	444	12	1328	81	1161	50	2820	120	347	14	1519	63	326	14	39.5	1.8	307	11	42.5	1.8	254	12	48.6	3.1	120.2	7	14.48	0.83	80.5	5.6	9.49	0.62	7.6	0.52	1.945	0.099
X414B_9	758	20	505	14	396	11	1121	30	152.3	4.1	793	20	184	4.9	45.5	1	172.5	4.2	20.43	0.56	111	3.2	19.13	0.56	44.3	1.2	4.87	0.18	25.42	0.76	3.24	0.11	3.3	0.19	1	0.042
X414B_10	1380	34	82.3	3.5	22.45	0.9	72.6	3.7	16.08	0.9	110.4	6.8	37.5	3	13.59	0.8	41.5	3	3.85	0.3	17.2	1.3	2.86	0.17	6.32	0.37	0.639	0.053	3.4	0.3	0.558	0.035	10.4	2.2	3.57	0.1
X414B_11	744	15	444	11	372	13	1009	29	138.8	5	696	15	157.3	4.3	37.71	0.92	142.4	3.3	17.2	0.46	95.4	2.7	16.04	0.46	37.5	1.1	4.33	0.17	22.2	0.72	2.916	0.095	3.28	0.19	1.023	0.033
X414B_12	195.4	6	1042	56	50.6	2.2	241.7	7.4	49.6	1.6	321	12	164.3	5.5	37.2	1	219.8	6.5	38.5	1.3	233.9	9.5	42.4	1.8	110.6	7	15.4	1.4	96	12	14.6	2.1	12.9	4.5	20.1	4
X414B_13	296.8	8.6	197.7	5.8	393	38	1094	93	134	10	581	39	105.6	5.2	15.51	0.55	76.6	2.7	8.34	0.29	43.4	1.6	7.56	0.32	18.21	0.71	2.275	0.087	12.64	0.56	1.798	0.088	23.4	1.2	2.17	0.22
X414B_14	372	12	1519	92	1264	28	3560	110	470	23	2320	150	570	57	105	16	539	63	67.5	7.7	352	35	58.7	4.4	140.5	7	17.52	0.67	102.1	2.8	14.1	0.26	160	33	11.2	0.41
X414B_15	831	17	431	12	313.6	7.1	919	22	130.2	3.8	707	26	184.8	8.7	43.9	2.2	183	10	20.8	0.93	104.9	4.4	16.71	0.51	36.5	1	3.92	0.14	19.93	0.69	2.454	0.096	33.8	6.3	1.243	0.039
X414B_16	237.2	5.5	1370	24	95.3	2	416.1	8	79.9	1.7	522	12	253.4	6	53	1.3	333	7.6	56.3	1.1	348.8	7.8	56.7	1.1	128.2	3.4	14.44	0.4	75.6	1.4	7.83	0.21	14.8	1.1	9.39	0.33
X414B_17	276.5	4.6	111.3	2.9	0.99	0.11	3.28	0.16	0.675	0.074	4.33	0.39	2.29	0.24	0.632	0.064	4.76	0.26	1.181	0.077	11.81	0.48	3.64	0.13	13.35	0.47	1.974	0.088	11.29	0.42	1.319	0.063	-5.43E-07	2.10E-08	0.0478	0.0056
X414B_18	709	17	421	11	332.3	8.9	927	20	128.6	3	674	18	153.9	4.1	37.3	1	146.9	3.6	17.58	0.49	94.1	2.5	15.5	0.42	35.63	0.96	3.9	0.16	19.82	0.59	2.54	0.1	13.9	2.7	1.236	0.048
X414B_19	200	11	2775	95	255.5	7.6	1023	34	171.7	6.3	929	43	401	17	25.4	2.1	475	14	88.1	2.1	567	16	104.5	2.6	278.2	7.3	36.7	1.1	212.2	5.8	25.18	0.51	16.6	3.1	118.9	2.8
X414B_20	85.8	3.3	4010	150	393	16	1508	59	242.6	7.3	1424	51	545	16	5.46	0.53	681	19	112.4	3.3	741	22	139.5	4.6	376	11	47.4	1.8	262	10	30.2	1	21.2	1.5	12.62	0.43
X414B_21	583	28	548	34	1182	51	1936	83	209	11	1052	79	309	22	84.9	5.5	330	22	38.3	2.5	184	15	24.9	2.2	42.9	2.7	3.97	0.3	18.18	0.85	2.5	0.15	184	10	9.72	0.48
X414B_22	352.2	9.4	107	3.3	527	13	592	17	47	1.5	180.6	6.8	36	1.5	10.35	0.43	37.6	1.4	4.61	0.2	25.2	1	4.25	0.16	10.16	0.38	1.179	0.074	7.12	0.35	1.166	0.07	41.3	1.5	19.54	0.48
X414B_23	545	14	543	14	4.04	0.22	14.14	0.58	2.45	0.14	15.81	0.93	8.19	0.5	1.85	0.12	22.92	0.8	6.49	0.22	68.5	2.1	18.61	0.56	60.4	1.8	8.37	0.22	49.3	1.2	6.56	0.2	0.018	0.011	0.542	0.028
X414B_24	1883	40	237.4	7.6	530	25	1362	46	166.8	5.9	757	26	125.4	3.7	26.62	0.64	86.3	2.3	9.2	0.4	49.6	1.9	8.57	0.33	21.57	0.83	2.58	0.14	14.82	0.8	2.01	0.11	20.6	1.3	2.57	0.14
X414B_25	552.4	8.3	97.1	2	299.9	3.4	727	14	78.9	1.5	326.7	5.7	48.7	1.1	10.31	0.33	34.1	1.1	3.76	0.14	19.91	0.65	3.55	0.09	9.03	0.35	1.147	0.082	6.52	0.4	0.943	0.04	19.49	0.65	6.87	0.14
X414B_26	217.4	5.3	359	16	16.8	1.2	85.2	6.5	17.8	1.4	121.9	9.2	41.5	2.8	12.77	0.74	56.8	3.5	8.43	0.4	57.3	2.4	12.77	0.52	39	1.8	5.76	0.28	39.8	1.8	6.91	0.31	23.7	2.1	51.3	2.5
X414B_27	155.3	5.5	1789	46	24.4	1.1	91.4	4.5	17.93	0.96	110.9	5.4	61.9	3.4	14.13	0.79	144.4	4.5	32.7	1.1	283.1	9.8	64.5	2.6	193.4	7.3	26.7	1.2	164.6	7.7	19.31	0.84	4.16	0.46	5.19	0.27
X414B_28	1706	66	458	19	771	28	1825	82	228	10	1096	41	231.9	8.8	55.8	2.4	195	8.2	21.98	0.75	113.6	3.7	18.06	0.92	38.9	2	4.12	0.21	20.7	1.2	2.42	0.11	12.77	0.67	2.75	0.13
X414B_29	408	32	943	33	1066	39	2830	120	326	11	1430	52	318	11	21.6	1.5	292	12	35.6	1.3	195.9	7.4	35.3	1.2	86.4	2.8	10.31	0.39	58.6	2.4	8.25	0.39	50.1	2.1	64	2.1
X414B_30	246.7	7.4	981	38	41.4	1.9	198	13	37.8	2	246	12	103.9	4.9	28	1.2	131.1	5.2	19.58	0.58	136.9	3.9	32.6	1.1	115.3	4.6	18.56	0.81	119.6	5.3	15.97	0.68	53.2	3.7	3.53	0.3
X414B_31	395	16	1054	24	2602	67	6000	150	701	17	2973	68	553	12	38.6	1.2	402.3	7.6	45.1	1.2	225.8	6.3	37.72	0.89	90.1	2.2	10.78	0.33	54.5	2	6.9	0.23	112.5	3.9	20.11	0.78
X414B_32	205	4.2	210	11	440	11	1053	27	112.2	3.7	453	17	89.5	5.9	18	1.3	81.7	6	9.77	0.8	50.7	4.2	7.94	0.51	18.26	0.79	2.143	0.09	12.37	0.41	2.137	0.075	41.8	2.5	37	1
X414B_33	1041	31	141	10	633	28	1291	43	126.7	6	474	20	72.8	3.2	13.47	0.75	51.5	2.8	6.18	0.45	33.8	2.6	5.61	0.45	14	1.2	1.74	0.15	10	0.81	1.26	0.11	269.6	9.4	162.1	5.7
X414B_34	347	15	983	22	61	5.1	229	20	41.1	3.8	264	23	114	7.9	33.8	1.9	173.3	9.8	31.8	1.4	224.8	6.7	41.7	1	106.2	2.4	13.61	0.3	81.5	1.9	10.52	0.19	33.1	4.9	14.94	0.71
X414B_35	142	10	3850	150	424	14	1655	59	256.7	7.3	1362	43	558	17	31.5	2	689	21	120.1	2.6	784	18	142	3.2	383	10	51.4	1.5	283.5	9.1	33.61	0.88	44.3	5.2	22.76	0.51
X414B_36	456	15	99.9	6.8	20.2	1.7	80.1	7.6	14.4	1.4	92.3	9.1	39.3	4.1	10.26	0.97	47.3	4.1	5.57	0.52	27.8	2.4	4.22	0.31	8.86	0.69	0.909	0.071	5.77	0.46	0.807	0.053	21.6	2	0.429	0.037
X414B_37	240	17	4260	210	804	45	2880	150	427	20	2220	90	756	35	66.5	5.6	800	41	112.2	4.9	650	23	119.3	3.7	326	11	47.5	1.5	311	12	43.9	1.6	185	28	8.39	0.69
X414B_38	759	23	763	25	656	14	1740	40	238.1	6.5	1178	37	290	11	69.5	2.6	274.9	9.8	33.2	1.3	176.1	5.7	29.03	0.89	66.6	1.7	7.52	0.26	38.6	1.4	4.98	0.15	40.6	7.1	2.309	0.075
X414B_39	2044	68	379	11	668	24	1522	45	181.8	5.1	882	35	199.4	7.6	53.8	2.1	181.7	7.1	20.12	0.71	98.4	3.7	15.16	0.58	31.9	1.1	3.21	0.14	15.42	0.75	1.78	0.1	27.8	3.1	3	0.12
X414B_40	459.8	9.1	1240	30	2370	93	5920	220	718	32	3010	120	548	19	23.38	0.6	400	12	47.5	1.6	258.2	5.7	44.5	1	111.4	2.7	13.42	0.35	72.6	2.1	8.87	0.24	29.1	1.2	8.04	0.28
X414B_41	656	28	405	18	315	14	886	30	122.5	5	649	29	149.1	7.2	35.4	2.3	139.9	7.1	16.6	0.63	89.3	4.4	15.49	0.79	35.6	1.6	3.91	0.18	19.9	1.1	2.64	0.12	5.55	0.65	1.247	0.063
X414B_42	506	10	1230	130	196	7.8	834	38	156.5	6.4	967	34	317	13	28	2.9	330	16	45.9	3.3	261	22	46	4.4	118	15	14.2	2.1	77	12	9.7	1.5	34.3	6.5	13.2	0.78
X414B_43	317.2	7.6	181.5	6.1	337.7	9.4	952	21	112.3	2.8	479	12	77.7	2.5	13.73	0.39	63.7	1.8	6.88	0.19	37.1	1.1	6.98	0.27	17.65	0.43	2.119	0.084	11.93	0.4	2.092	0.069	13.22	0.71	10.63	0.31
X414B_44	694	14	892	24	2452	66	5490	140	666	17	2699	90	469	11	39	1.2	326.7	7	36.4	1	187.5	4.4	31.74	0.71	79.2	1.9	9.23	0.34	50.7	1.3	6.58	0.18	84.9	2.8	17.46	0.43
X414B_45	437	10	223.5	6.6	299.8	8.3	884	27	109.9	3.4	513	12	90.3	3.1	19.03	0.63	70.2	1.9	8.21	0.24	45.9	1.3	8.34	0.28	22	0.74	2.85	0.1	17	0.6	2.443	0.077	17.61	0.73	4.9	0.15
X414B_46	626	17	1153	21	370	8.7	1340	34	215.9	5	1324	32	412	10	105.4	2.6	434	11	53.4	1.3	279.2	6.5	45.63	0.92	101.9	1.9	11.04	0.27	57.8	1.7	7.7	0.18	84.5	4.6	1.871	0.057
X414B_47	532	17	898	35	312	11	955	43	139	7.2	754	29	205.1	7.5	58	1.6	221.5	7.2	28.85	0.98	176.4	6.1	32.31	0.99	80.8	1.8	9.57	0.4	53.6	2	7	0.22	5.25	0.22	2.243	0.052
X414B_48	473	16	970	33	320	12	982	39	148.3	7.1	808	33	222.5	5.7	51.1	2.1	249.1	9.4	32.8	1.2	202.8	6.8	36.3	1.3	90.7	3.1	10.44	0.33	56.3	2.7	7.4	0.3	5.88	0.5	1.86	0.12
X414B_49	157.6	3.8	2428	63	187	4.9	779	25	130.5	4	759	19	344	8.4	9.32	0.33	442.8	9.7	80.7	2.1	521	13	93.9	2.2	236.1	5.4	29.9	0.66	165.7	4	19.72	0.49	4.54	0.23	57.8	1.6
X414B_50	728	24	878	34	526	17	1581	65	241	11	1302	58	353	29	93	6.5	357	31	42.2	4.1	219	15	33.2	1.9	69.6	2.7	7.14	0.31	34.7	1.7	4.14	0.21	102	19	2.23	0.12
X414B_51	177.8	3.6	1823	40	70	2.1	348	10	89	2.1	692	20	331.5	6.8	32.25	0.61	395.4	7.9	57.73	0.96	350.9	5.4	65.9	1.4	170.9	2.7	20.87	0.49	113.4	2.5	14.27	0.3	6.61	0.33	25.38	0.67
X414B_52	131	16	2978	65	387	8.6	1540	43	239.4	4.9	1321	34	507	11	20.7	2.6	590	13	97.8	1.7	620	12	111.2	2	283.8	7	36.73	0.81	209.4	4.6	25.56	0.61	43.7	7.3	74.6	1.7
X414B_53	2170	52	85.8	2.1	213.3	5.4	671	21	84.9	2.5	396	11	53.9	1.6	10.68	0.36	35.3	1.1	3.23	0.11	16.1	0.52	3	0.1	7.31	0.25	0.909	0.059	5.49	0.24	0.917	0.036	5.93	0.28	7.44	0.18
X414B_54	280	15	1912	61	1124	24	3637	86	526	15	2478	82	628	20	31.5	2.4	540	16	68.2	2.6	376	10	67.6	1.7	181.4	5.2	24.27	0.6	140.8	3.7	19.73	0.56	390	100	32.8	1.3
X414B_55	1133	57	28.4	3.2	2.39	0.82	11.8	2.7	3.6	0.7	37.5	5.2	46.9	6.8	8.8	1.3	40.3	5.2	3.04	0.38	10.5	1.4	1.29	0.16	3.17	0.34	0.519	0.066	4.47	0.3	0.819	0.063	2.54	0.48	0.076	0.011
X414B_56	920	39	739	23	580	31	1584	74	211.8	9	1080	43	383	19	82.7	5.8	482	30	50	3.1	216	11	30	1.3	62.1	2.9	6.64	0.41	31.8	2.1	3.73	0.24	170	31	1.302	0.066
X414B_57	697	15	508.8	9.5	419	10	1148	22	157.3	3.8	814	19	182.4	4.5	44.5	0.92	172.5	3.3	20.43	0.44	112.9	2.5	19.12	0.44	45.09	0.86	5.08	0.16	26.08	0.84	3.345	0.09	6.78	0.33	1.658	0.04
X414B_58	155.8	3.5	1134	27	910	21	2580	59	340.7	9.2	1572	35	314.5	6.2	10.46	0.29	264.9	6.8	35.26	0.83	210	5	39.53	0.91	106.6	2.5	13.96	0.4	79.1	2.2	10.2	0.28	13.95	0.56	5.01	0.13
X414B_59	1745	39	436	12	660	15	1620	35	207.9	5.7	1008	22	233.6	6.3	64.7	1.6	209.7	5.7	24.01	0.63	120	3.4	17.87	0.48	36	1.1	3.41	0.12	16.15	0.58	1.879	0.066	29.77	0.99	5.2	0.12
X414B_60	518	12	426	8.7	197.3	4.1	599	13	90.4	2.6	477	13	123.8	3.6	25.78	0.6	119.1	3.1	15.28	0.37	88.6	2.4	16.29	0.37	40.9	1	4.74	0.13	26.57	0.88	3.47	0.11	3.86	0.18	0.864	0.027
X414B_61	738	28	456	14	327	11	951	31	138	4.4	747	24	197.7	8.9	48.8	2.2	202	11	22.2	1	112.8	4.5	18.09	0.61	39.3	1.1	4.22	0.17	21.18	0.85	2.66	0.12	37.8	7	1.548	0.079
X414B_62	1367	33	535	12	627	20	1627	50	216.2	5.2	1105	32	248.8	6.5	68.7	1.8	229.6	5.9	25.26	0.59	129.5	3.5	21.17	0.55	46.7	1.2	4.98	0.16	24.21	0.73	2.965	0.086	29.6	1	10.36	0.23
X414B_63	474	11	1435	57	1680	61	4380	140	569	24	2570	110	519	22	40.8	1.7	424	17	53	1.9	293	12	51.7	1.9	125.3	5.6	14.64	0.66	78.9	4	9.88	0.45	51	2.9	12.26	0.54
X414B_64	550	22	170	12	78.9	5.1	211	11	32.6	2	182	15	60.4	6.5	16.1	1.2	69.4	6.5	8.16	0.64	40.5	3	6.47	0.45	14.1	1.4	1.62	0.14	8.3	0.77	1.18	0.12	13.3	2.4	2.14	0.1
X414B_65	154.9	9.3	3109	68	359.6	7.2	1381	31	219.7	4.2	1191	31	505	12	25.7	1.5	595	11	102.1	1.8	643	12	114.9	2.5	299.6	6.1	40.6	1	248.4	4.5	30.62	0.72	91.6	7.4	83	1.5
X414B_66	144.3	3.9	2331	57	194.2	7.1	751	21	125.4	3.9	693	21	317.8	7.9	31.45	0.64	388	11	68.8	2.1	442	12	81.4	2.4	219.1	6.5	30.57	0.93	179.7	4.4	22.32	0.58	10.65	0.93	28.9	1.1
X414B_67	626	13	251.5	6.7	267	9	715	23	92.7	2.8	427	11	89.1	2.7	16.51	0.5	75.3	2.2	9.13	0.27	52.4	1.4	9.16	0.23	22.95	0.65	2.88	0.11	15.78	0.59	2.038	0.074	15.54	0.63	3.431	0.079
X414B_68	343	20	2450	110	251	13	863	35	132.8	5	773	33	306	13	39.8	3	426	16	68.9	3.5	444	20	88.1	4.9	229	12	29.3	1.5	167	8.4	21.9	1.2	55	13	12.54	0.56
X414B_69	359	9.1	197	12	845	21	1707	48	165.9	5.5	618	23	102.4	6.7	18.3	1.3	82.1	6.3	9.04	0.77	42.7	3	6.8	0.43	16.16	0.85	2.06	0.11	12.9	0.63	2.069	0.09	94	5.5	44.38	0.97
X414B_70	753	16	473	11	386	11	1057	25	146.4	4.2	764	20	169.8	4.7	42.4	1.1	158.2	3.9	18.93	0.47	104.3	2.6	17.9	0.51	42.7	1.2	4.69	0.18	24.4	0.78	3.13	0.11	5.34	0.29	1.389	0.05
X414B_71	697	16	570	13	495	14	1312	39	166.6	5.6	831	17	188.7	4.9	32.53	0.95	174.7	4.2	21.74	0.62	121.1	2.8	21.16	0.58	51.5	1.3	5.9	0.21	31.6	1.1	4.07	0.13	16.48	0.62	5.92	0.13
X414B_72	273	39	415	14	3.82	0.92	19	3.6	4.97	0.92	40.3	6.4	32.6	5.7	7.3	1.2	47.5	5	7.67	0.37	55.8	1.9	13.54	0.44	47.8	1.6	7.47	0.26	50.1	1.6	7.3	0.22	2.14	0.66	11.14	0.38
X414B_73	2690	110	321.6	7.8	3.56	0.73	29.1	1.8	12.1	0.36	175.6	4.1	440.3	6.8	127.1	2.1	776	12	55.56	0.94	164.5	3.7	16.4	0.43	26.68	0.8	2.38	0.13	10.34	0.59	0.917	0.056	8.38	0.9	0.147	0.028
X414B_74	834	21	568	17	485	17	1396	44	194.1	5.9	1000	39	228.3	9.8	34.1	2.3	193.9	8.9	22.4	1.1	120.3	5.9	21.47	0.97	51.4	2	6.43	0.27	36.1	1.1	4.95	0.16	36.1	7.9	15	0.39
X414B_75	248.9	6.6	113.3	2.8	9.94	0.58	51.3	2.2	11.63	0.56	82.1	3.6	28.3	1.8	6.83	0.27	29.1	1.3	3.65	0.17	21.13	0.96	4.06	0.16	11.04	0.56	1.443	0.081	8.31	0.49	1.296	0.061	0.869	0.097	32.5	1.2
X414B_76	256	12	1799	87	2160	110	5480	300	691	49	3410	240	658	35	56	3.6	564	27	66.4	3	378	12	67.3	2.9	157.7	8.6	18	1.1	95.7	5.7	12.05	0.74	51	11	3.07	0.19
X414B_77	339.9	7.3	1202	30	1114	29	3466	89	455	11	2015	35	407.8	9	32.42	0.76	323	6.8	39.58	0.84	220.1	4.4	40.78	0.76	109.8	2.4	15.57	0.38	98.9	2.5	14.32	0.24	67.6	2	53.8	1.1
X414B_78	203.8	3.8	137.8	5.1	8	1.2	8.16	0.83	3.07	0.4	18.5	2.4	6.51	0.63	3.75	0.25	13.64	0.93	2.67	0.12	19.65	0.83	4.87	0.23	15.81	0.64	2.23	0.11	14.96	0.51	2.71	0.13	0.65	0.13	1.74	0.12
X414B_79	399	13	335	10	166.4	4.1	525	16	79.2	2.6	447	13	140.3	5.7	32.5	1.3	147.1	5.5	17.16	0.66	83.2	2.7	13.63	0.5	31.4	1.1	3.57	0.13	20.95	0.75	3.343	0.095	73.5	4.7	7.74	0.29
X414B_80	140.4	2.8	1373	32	40.4	3.1	171	11	37.4	2	279	16	146.7	6.4	32.7	1.1	247.7	5.3	47.5	1.2	321.9	5.3	55.8	1.5	120.2	2.8	13.24	0.27	63.2	1.7	6.49	0.16	8.3	1.4	14.98	0.33
X414B_81	445	17	1147	42	469	26	1385	87	195.9	9.1	1036	46	259	10	57.3	1.7	275.1	8.7	38	1.3	226.5	8.1	42.3	1.5	101.7	3.4	12.22	0.5	66.6	2.7	8.17	0.33	4.66	0.21	1.19	0.041
X414B_82	1330	150	766	69	801	75	2010	170	266	26	1270	110	317	13	62.1	2.4	293.1	9.5	33	1.7	170	14	29.7	2.6	67.4	6.2	7.27	0.67	38.6	3.8	4.65	0.46	16.5	3.9	3.47	0.35
X414B_83	215.2	5.2	1081	29	65.3	2	270.2	8.3	48.5	1.4	297.7	9.6	141.2	4.3	20.26	0.55	216.2	5.1	40.3	1.2	256	6.1	41.7	1.1	95.2	2.5	11.16	0.3	59.5	1.7	6.82	0.2	0.59	0.13	15.1	0.91
X414B_84	901	32	656	22	567	22	1542	64	207.4	7.8	1057	38	267	12	61.8	2.7	276	19	31.5	1.8	162.3	6.6	25.69	0.91	57.3	2	6.04	0.26	31.6	1.5	3.73	0.15	53	15	2.565	0.094
X414B_85	130.9	2.8	5810	160	4242	99	11470	320	1602	44	7520	180	1528	31	108.1	2.6	1356	29	188.2	4	1146	26	217.3	4.8	583	12	73.7	1.9	415.3	9.7	55.3	1	156.1	3.7	32.76	0.7
X414B_86	185	18	3870	100	538	15	1804	50	263.6	7.2	1366	28	609	13	25.8	2.1	842	18	146.9	3.3	877	25	135.4	3.3	291.5	7.3	30.21	0.81	144.6	4.2	15.5	0.44	44.8	3.9	37.81	0.99
X414B_87	595	14	1424	32	1539	32	4155	73	549	10	2578	66	570	12	52.7	2.7	488	11	58.5	1.4	313	7.3	53.4	1.1	124.4	2.4	14.14	0.52	73.3	1.8	9.27	0.2	100.3	8.8	14.89	0.26
X414B_88	831	32	541	15	473	14	1253	40	163.7	4.8	812	22	196.2	6.7	43.9	1.3	180.6	4.9	21	0.68	114.1	3.3	19.75	0.57	47.3	1.3	5.39	0.19	27.73	0.85	3.505	0.082	3.83	0.18	1.09	0.035
X414B_89	478	11	1083	34	135.9	6.5	373	38	80.7	7.8	499	51	191	19	51.6	5.3	226	23	28.5	2.7	141	10	24.1	1	62.3	2.1	7.02	0.23	37.1	1.6	5.5	0.23	172	21	47.9	1.9
X414B_90	455	11	83.4	2.2	203.4	5.9	473	10	54.4	1.7	247.2	8.1	40.8	1.4	5.76	0.23	33.8	1.1	3.27	0.11	17.01	0.66	3.22	0.1	8.41	0.3	0.906	0.063	5.5	0.34	0.986	0.055	4.84	0.44	2.52	0.15
X414B_91	562	25	658	27	1230	140	3220	390	386	47	1620	150	274	23	12.36	0.97	193	9.4	22	1	126.5	5.5	25	1	71.2	2.1	10.25	0.36	65.1	2.1	9.85	0.49	45.7	4.7	11.72	0.72
X414B_92	494.3	7.9	250.3	4.4	1863	36	2562	49	206.3	4.4	749	14	114.1	2.6	29.23	0.78	94.3	3.5	9.68	0.39	50.8	1.4	9.22	0.22	23.2	0.48	2.872	0.096	18.56	0.56	3.275	0.087	108.6	3.1	22.16	0.53
X414B_93	1032	25	71.4	2.4	9.26	0.41	46.8	1.5	9.98	0.36	75.1	2.5	24.6	1.3	6.17	0.22	25.9	1.2	2.84	0.14	14.49	0.71	2.61	0.12	6.69	0.3	0.832	0.047	5.22	0.26	0.796	0.038	5.89	0.32	2.517	0.08
X414B_94	328.7	8.7	116.9	2.3	21	2.2	58.3	4.4	10.71	0.73	64.3	3.7	40.2	2	12.8	0.51	83.6	2.9	12.34	0.32	51.6	1.8	5.84	0.22	9.8	0.42	0.897	0.08	3.76	0.25	0.455	0.033	7.34	0.59	1.44	0.15
X414B_95	488	13	249.6	7.6	543	21	1498	52	176.2	5.5	750	23	117.5	3.6	19.22	0.54	84.5	2.3	9.36	0.31	50.3	1.8	9.01	0.33	23.58	0.85	3.03	0.11	18.67	0.72	2.764	0.088	53.1	1.8	21.9	0.55
X414B_96	358.5	6.3	83.9	1.6	9.04	0.31	29.03	0.8	4.49	0.21	24.5	1.2	9.32	0.47	3.89	0.15	14.41	0.45	2.712	0.087	19.14	0.54	3.37	0.12	6.88	0.33	0.633	0.039	2.59	0.18	0.284	0.021	0.097	0.03	1.596	0.039
X414B_97	2632	86	317.9	8.9	5.79	0.46	40.3	1.8	16.16	0.71	199.8	4.5	418	12	119.7	3.8	729	18	53.1	1.7	165.3	4.8	16.32	0.46	26.3	1.2	2.3	0.14	10.04	0.55	0.996	0.073	18.4	1.9	0.725	0.058
X414B_98	585	50	765	28	106.6	6.2	469	18	92.8	3.2	614	28	287	11	74.8	3.6	346	8.6	48.2	1.6	248.8	9	33.1	1.5	58.6	2.5	5.31	0.28	24.1	1.3	2.79	0.18	124.7	5.7	19.9	3.4
X414B_99	245	16	1477	34	895	24	2672	55	360.7	8	1743	42	433.4	9.2	22.39	0.77	405.2	8.3	52.37	0.99	293.8	8.1	52.5	1.7	134.6	3.9	16.77	0.52	98.6	1.9	13	0.31	82.4	4.4	13.09	0.47
X414B_100	685	14	543	14	427.9	9.9	1220	25	166.5	4.3	837	18	191.3	4.6	45.1	1	179.5	4.4	20.71	0.45	115.2	2.9	19.65	0.45	45.5	1.2	5.08	0.13	27	0.75	3.31	0.11	4.51	0.25	1.491	0.045
X414B_101	686	21	447.9	7.5	331.5	5.8	982	18	146.7	2.4	789	14	195.3	3.8	41.26	0.64	179.3	2.8	19.68	0.32	104.9	2.1	17.37	0.42	40.07	0.9	4.4	0.14	22.79	0.62	2.887	0.086	7.1	0.33	1.838	0.06
X414B_102	486	10	719	14	283	7.1	1246	33	198.1	4.5	1071	26	266.6	5.4	38.47	0.95	228.6	4.2	27.31	0.57	151.3	3	26.37	0.58	65	1.4	8	0.18	42.7	1.2	5.53	0.15	13.76	0.64	21.7	0.35
X414B_103	764	20	699	44	696	54	1700	120	200	14	897	47	216	12	44.7	1.6	206.4	9.6	26.6	1.2	146.4	6.8	25.3	1.4	63.1	3.5	7.46	0.48	41.6	2.6	5.05	0.3	37.1	4.1	1.5	0.11
X414B_104	1293	36	809	27	854	25	2036	62	262.9	8.2	1244	43	280.4	9.2	56.6	1.8	269.9	7.5	33.21	0.92	179.2	5.6	30.4	0.79	71	2.2	7.9	0.28	40.5	1.4	4.85	0.16	26.3	1.7	3.967	0.091
X414B_105	119.1	2.7	3477	91	308.4	8.7	1393	40	234.6	6.7	1280	37	466	13	14.63	0.47	556	14	94.8	2.6	634	19	127.7	3.6	359	11	50.4	1.4	310.6	7.9	43.3	1.3	5.32	0.34	26.6	1.2
X414B_106	586	59	388	21	45.7	3.2	247	16	49.7	3.2	316	20	126.1	7.2	26.4	1.5	133.7	9.7	14.23	0.92	72	4.2	13.16	0.83	34.6	1.8	4	0.29	24.2	1.8	4.15	0.32	23.9	3.3	9.3	1.2
X414B_107	520	12	129.4	9.3	11.94	0.63	69.5	4.3	19.4	1.2	148	10	47.3	3.6	11.59	0.77	43.5	2.8	4.95	0.43	26	1.9	4.49	0.37	10.52	0.86	1.38	0.13	7.59	0.71	1.19	0.12	0.02	0.013	0.63	0.12
X414B_108	302.5	7.8	2086	74	1605	60	4340	180	597	22	2780	100	608	17	34.9	1.3	539	17	70.9	2.4	409	16	75.3	2.6	194.6	6.3	23.9	0.79	127.3	3.5	15.12	0.56	71.2	4.2	23.84	0.86
X414B_109	516.7	9.5	362	10	43.9	1.8	193.4	6.6	39	1.4	268	10	85.8	2.8	22.04	0.69	99.9	3	12.2	0.4	71.5	2	13.11	0.31	33.2	1.2	4.13	0.17	22.47	0.89	3.21	0.14	7.8	1.8	4.99	0.17
X414B_110	606.8	7.9	793	16	37.4	3.1	173	16	34	2.4	245	14	121.8	3.9	40.2	1.4	163.9	4.1	25	0.73	155.9	3.4	28.97	0.68	76.3	1.6	9.7	0.24	54.2	2	6.94	0.17	22.8	3	5.16	0.14
X414B_111	1660	46	387	13	4.87	0.37	37.9	1.6	13.63	0.6	170.3	9.8	385	29	117.8	8.3	770	51	62.3	2.8	194.9	8.6	19.74	0.68	31.2	1	2.63	0.1	11.27	0.56	1.014	0.057	25.8	1	0.281	0.015
X414B_112	3810	190	1542	84	33.6	2.4	137.4	9.3	29.2	2.1	224	16	149.9	7.1	46.1	2.3	364	17	64.1	3.5	402	21	66.7	3.4	146.9	8.3	16.36	0.87	80.7	4	8.57	0.42	14.9	6.3	0.626	0.045
Values in ppm, 2 sigma errors
